# Supplementary material for: Fe3O4@SiO2 nanoparticles as a high-performance Fenton-like catalyst in a neutral environment
Source: Royal Society of Chemistry journal article supplement (doi:10.1039/c4ra10207j), 2014-12-12
Supplement: c4ra10207j1.pdf [file c4ra10207j1.pdf]

## $\text{Fe}_3\text{O}_4@\text{SiO}_2$ nanoparticles as high-performance Fenton-like catalyst in neutral environment

Sheng-Tao Yang,\* Wu Zhang, Jingru Xie, Rong Liao, Xiaoliang Zhang, Baowei Yu, Ruihan Wu, Xiaoyang Liu, Hongliang Li, and Zhen Guo

College of Chemistry and Environment Protection Engineering, Southwest University for Nationalities, Chengdu 610041, China. Email: [yangst@pku.edu.cn](mailto:yangst@pku.edu.cn)

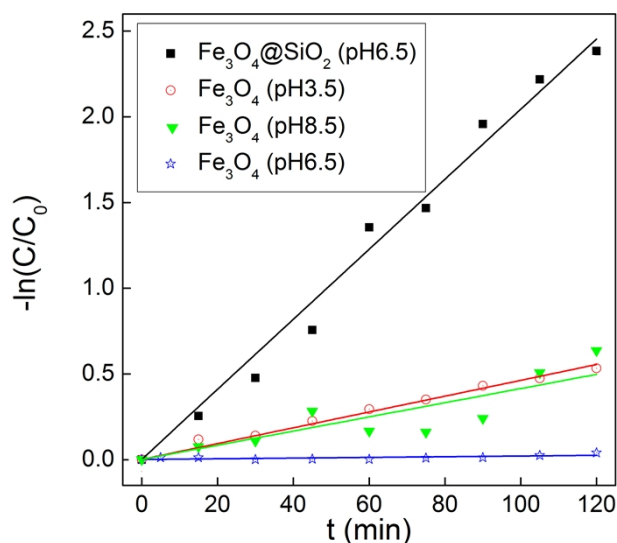

**Figure S1** Pseudo-first-order kinetic plots for the decolorization of MB in different Fenton-like systems.

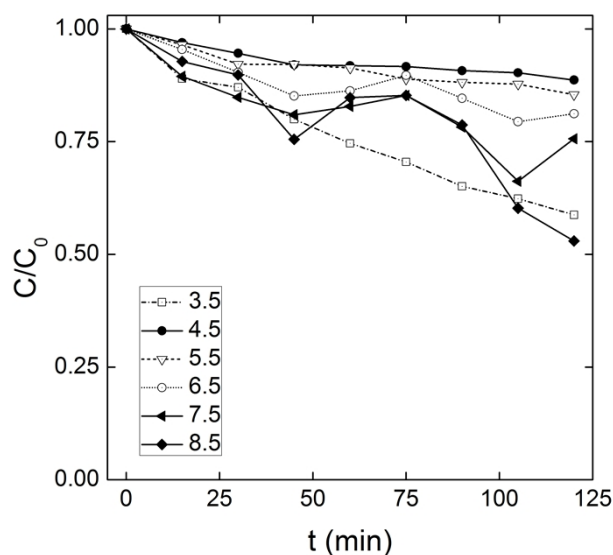

**Figure S2.** Decoloration of MB in  $\text{Fe}_3\text{O}_4\text{-H}_2\text{O}_2$  system at different pH values.
